# Supplementary material
Source: Research Square preprint supplement (doi:10.21203/rs.3.rs-9290990/v1)
Supplement: Supplementary file 1 [file 389c5983f3620d91d62fc817.docx]

**Highlights**

- TD2 intercropping (52,500 plants ha–1) enhances maize yield by 23.24%–45.34%, photosynthetic enzyme activity, and soil microbial biomass carbon.
- Soybean N fixation boosts soil N availability, benefiting maize growth and grain yield, with a 1.79%–26.79% increase in maize protein content.
- Moderate planting density optimizes LER, achieving 1.08 in 2022 and 1.11 in 2023, and reduces crop competition.
- Photosynthetic enzyme activity in maize improves light interception and carbon assimilation, with RuBisCO activity increased by 44.36%.
- Intercropping increases soil microbial activity, supporting carbon sequestration and sustainable productivity, with MBC reaching 138.13 mg kg–1 in 2023 under TD2.
