# Supplementary material
Source: Research Square preprint supplement (doi:10.21203/rs.3.rs-9290990/v1)
Supplement: Supplementary file 2 [file 4761f1b0e8dc995fa85d5d88.docx]

**Table 1** Effect of intercropping ratio (I) and density (D) management on grain yield and overall yield metrics of maize and soybean during 2022–2023

| **Years** | **Treatments** | **Yield (kg ha –1)** | | | **Harvest index (HI)** | | **Radiation use**  **efficiency (RUE)** | | | **Land equivalent ratio (LER)** |
| --- | --- | --- | --- | --- | --- | --- | --- | --- | --- | --- |
| Y*m* | Y*s* | Y*IS* | HI*m* | HI*s* | RUE*m* | RUE*s* | RUE*IS* | LER*IS* |
| **2022** | **CK** | 3894±15f | 2548±69a | — | 0.63±0.01b | 0.40±0.01c | 1.19±0.04g | 0.42±0.01a | 0.80±0.02g | — |
|  | **FD1** | 4044±69ef | 2493±48ab | 3268±54de | 0.68±0.01a | 0.43±0.12bc | 1.40±0.01f | 0.40±0.00ab | 0.90±0.00f | 1.01±0.03b |
|  | **FD2** | 4978±54c | 2425±51ab | 3702±22b | 0.58±0.01c | 0.46±0.00a | 1.79±0.01d | 0.37±0.01bc | 1.07±0.01d | 1.12±0.01a |
|  | **FD3** | 4273±123de | 1967±29d | 3120±70e | 0.48±0.02e | 0.43±0.00b | 1.68±0.01e | 0.32±0.01de | 1.00±0.01e | 0.93±0.02c |
|  | **TD1** | 4411±40d | 2377±52b | 3394±13cd | 0.67±0.01a | 0.43±0.01ab | 1.96±0.01c | 0.38±0.01bc | 1.18±0.01c | 1.03±0.01b |
|  | **TD2** | 5841±107a | 2124±23c | 3982±65a | 0.61±0.01bc | 0.44±0.01ab | 2.41±0.02a | 0.35±0.02cd | 1.39±0.01a | 1.17±0.03a |
|  | **TD3** | 5246±67b | 1795±5e | 3521±36c | 0.53±0.01d | 0.44±0.00ab | 2.28±0.03b | 0.29±0.02e | 1.28±0.02b | 1.03±0.02b |
| **I** | | * | * | * | ns | ns | ** | * | ** | * |
| **D** | | ** | ** | ** | ** | ns | ** | ** | ** | ** |
| **I × D** | | ** | ns | ns | ** | ns | ns | ns | ns | ns |
| **2023** | **CK** | 4133±295e | 3138±118a | — | 0.81±0.08b | 0.56±0.04a | 1.40±0.12e | 0.40±0.01a | 0.90±0.05f | — |
|  | **FD1** | 4850±58d | 2956±33ab | 3903±21b | 0.95±0.03a | 0.66±0.02a | 1.66±0.05d | 0.36±0.00b | 1.01±0.03e | 1.07±0.04b |
|  | **FD2** | 6550±144ab | 2444±143c | 4497±26a | 0.82±0.02b | 0.63±0.03a | 2.22±0.08b | 0.32±0.01d | 1.27±0.04b | 1.19±0.04a |
|  | **FD3** | 6017±120b | 2143±190cd | 4080±48b | 0.78±0.04b | 0.72±0.06a | 1.99±0.04c | 0.30±0.00e | 1.14±0.02cd | 1.08±0.04b |
|  | **TD1** | 5433±142c | 2539±172bc | 3986±66b | 0.97±0.06a | 0.57±0.08a | 1.78±0.01d | 0.35±0.00c | 1.07±0.01de | 1.07±0.02b |
|  | **TD2** | 6907±81a | 2280±170c | 4594±126a | 0.78±0.05b | 0.60±0.08a | 2.47±0.06a | 0.31±0.00e | 1.39±0.03a | 1.21±0.02a |
|  | **TD3** | 6283±296b | 1843±123d | 4063±208b | 0.73±0.05b | 0.60±0.09a | 2.13±0.01bc | 0.24±0.00f | 1.19±0.00bc | 1.06±0.03b |
| **I** | | ns | * | ns | ns | ns | * | ** | ns | ns |
| **D** | | ** | ** | ** | ** | ns | ** | ** | ** | ** |
| **I × D** | | ns | ns | ns | ns | ns | ns | ** | ns | ns |

Means with different letters in the same column indicate significant differences (*P* < 0.05); values are means ± SE (n = 3); ns, not significant; ⁎ significant at *P* < 0.05; ⁎⁎ significant at *P* < 0.01. Y*m*, maize yield; Y*s*, soybean yield; IS, intercropped system. CK, monocropping maize and soybean; F, four rows of maize alternated with four rows of soybean; T, two rows of maize alternated with two rows of soybean. D1, D2, and D3 were maize densities of 45,000, 52,500, and 60,000 plants ha⁻¹, respectively.

**Table 2** Effect of intercropping ratio (I) and density (D) management on growth and yield traits of maize and soybean during 2022–2023

| **Years** | **Treatments** | **Maize** | | | | **Soybean** | | | |
| --- | --- | --- | --- | --- | --- | --- | --- | --- | --- |
| **PH (cm)** | **EL (cm)** | **EG (mm)** | **GNC** | **PH (cm)** | **SNC** | **BN** | **GNP** |
| **2022** | **CK** | 340±2.6a | 17±0.3 a | 36±0.3e | 304±12.64d | 68±1.6e | 10±0.2d | 1±0.1c | 73±1.2a |
|  | **FD1** | 302±4.6d | 17±0.6a | 37±0.6de | 316±12.2cd | 71±1.7de | 10±0.3cd | 1±0.0c | 72±2.1a |
|  | **FD2** | 317±7.8cd | 18±0.3a | 39±0.7ab | 313±6.7cd | 75±0.9cd | 11±0.1bc | 2±0.1bc | 68±1.5ab |
|  | **FD3** | 335±2.8ab | 17±0.3a | 38±0.3bcd | 338±3.0bc | 85±3.2ab | 12±0.2b | 2±0.2b | 62±2.4bc |
|  | **TD1** | 285±0.0e | 17±0.6a | 37±0.3cde | 347±11.6b | 73±3.9cde | 11±0.4bc | 2±0.1b | 68±4.0ab |
|  | **TD2** | 306±6.2cd | 18±0.3a | 39±0.3a | 386±6.0a | 80±0.4bc | 11±0.2b | 3±0.3a | 57±2.6c |
|  | **TD3** | 321±7.8bc | 17±0.3a | 38±0.3abc | 312±7.4cd | 87±1.6a | 13±0.1a | 3±0.2a | 49±1.5d |
| **I** | | ns | ** | ns | * | ns | * | ** | * |
| **D** | | ** | ns | * | * | ** | ** | * | ** |
| **I × D** | | ns | ns | ns | ** | ns | ns | ns | ns |
| **2023** | **CK** | 312±7.5a | 17±0.7c | 39±0.9c | 295±8.2e | 62±0.5ab | 9±0.2abc | 1±0.0d | 88±2.4a |
|  | **FD1** | 283±5.9b | 19±0.3ab | 38±0.3c | 322±10.7d | 60±1.5b | 10±0.7a | 1±0.0c | 78±3.0ab |
|  | **FD2** | 292±4.1b | 19±0.3ab | 40±0.3bc | 370±5.5b | 63±0.4ab | 9±0.8ab | 2±0.1bc | 64±6.6cd |
|  | **FD3** | 279±2.8b | 18±0.3bc | 40±0.3abc | 333±2.1cd | 66±1.9a | 9±0.3ab | 2±0.3b | 60±3.8cd |
|  | **TD1** | 281±2.3b | 19±0.9a | 39±0.3bc | 355±6.3bc | 54±1.9c | 8±0.2bcd | 2±0.1bc | 69±4.0bc |
|  | **TD2** | 263±7.4c | 18±0.3bc | 41±1.3ab | 409±12.7a | 55±3.0c | 7±0.2d | 2±0.1a | 65±0.6c |
|  | **TD3** | 290±3.b | 18±0.3bc | 42±0.7a | 356±2.4bc | 55±1.3c | 8±0.2cd | 2±0.1a | 53±4.0d |
| **I** | | ns | ns | * | ns | ** | * | ns | ns |
| **D** | | ns | ns | * | ** | ns | ns | ** | * |
| **I × D** | | * | ns | ns | ns | ns | ns | ns | ns |

Means with different letters in the same column indicate significant differences (*P* < 0.05); values are means ± SE (n = 3); ns, not significant; ⁎ significant at *P* < 0.05; ⁎⁎ significant at *P* < 0.01. PH, plant height; EL, ear length; EG, ear girth; GNC, Grain number per cob; SNC, stem node count; BN, branch number; GNP, grain number per plant. CK, monocropping maize and soybean; F, four rows of maize alternated with four rows of soybean; T, two rows of maize alternated with two rows of soybean. D1, D2, and D3 were maize densities of 45,000, 52,500, and 60,000 plants ha⁻¹, respectively.
