# Supplementary material
Source: Research Square preprint supplement (doi:10.21203/rs.3.rs-9290990/v1)
Supplement: Supplementary file 3 [file e9aee17e4fa2dcb8d8e21700.pdf]

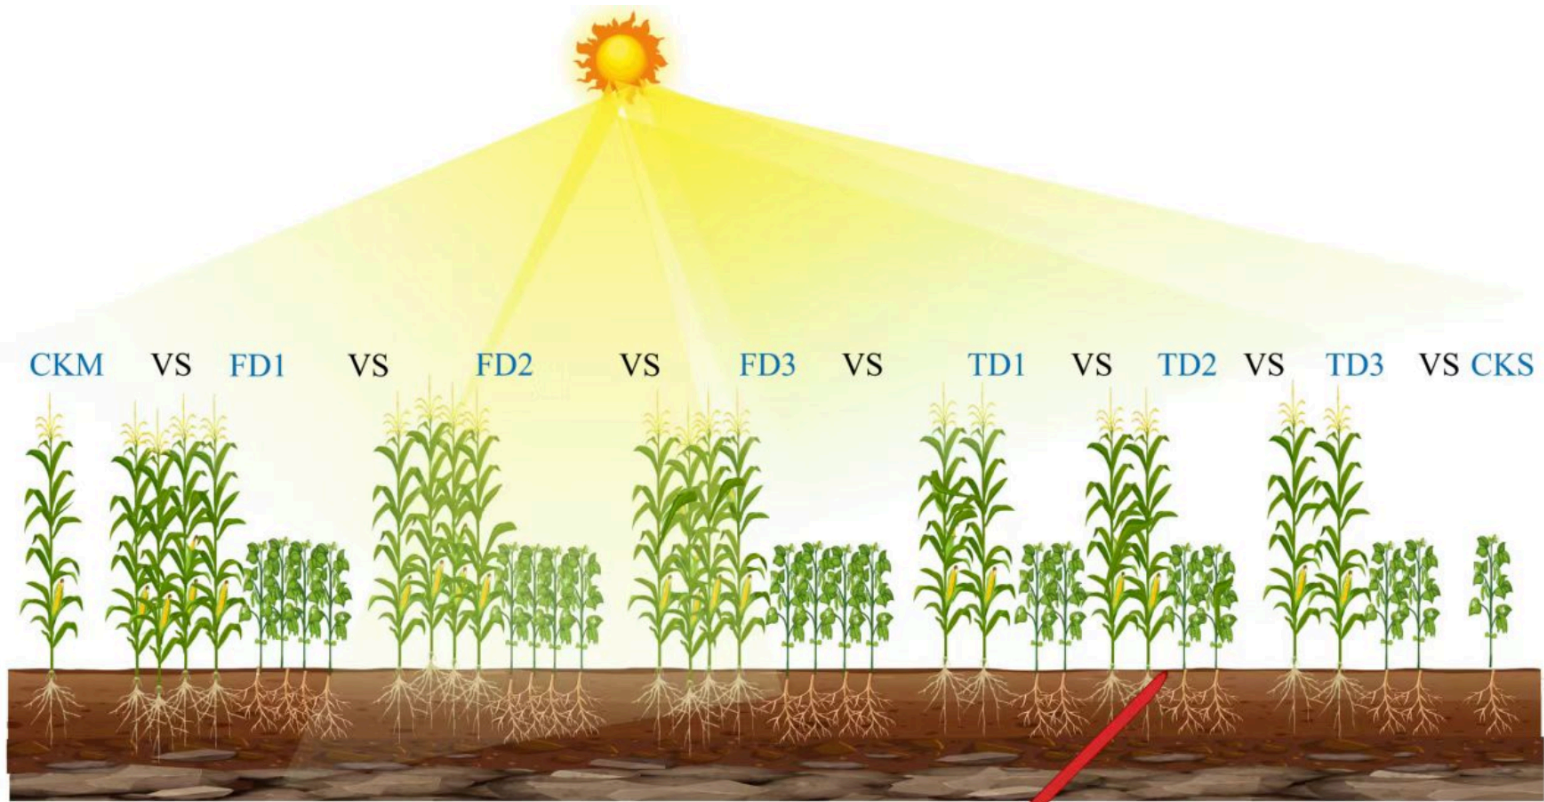

PCA (Principal Component Analysis)

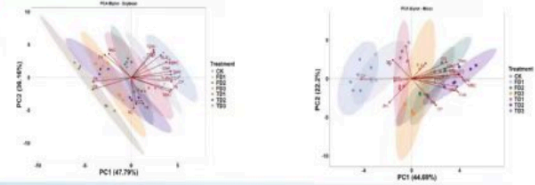

**Intercropping ID2 system**

**System output: LER > 1 (1.01-1.21)**

**High-yield maize (23.24-45.34%) + high-quality soybean**

Light utilization

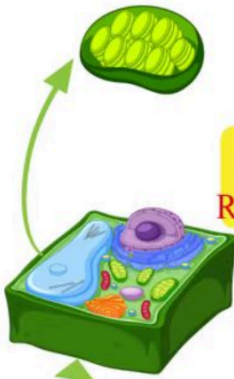

PEPC  
RuBisCO

Crude protein content ↑ (1.79-26.79%)

Starch content ↑ (14.89-19.18%)  
soluble sugar content ↑ (10.24-13.57%)  
crude fat content ↑ (7.39-7.97%)

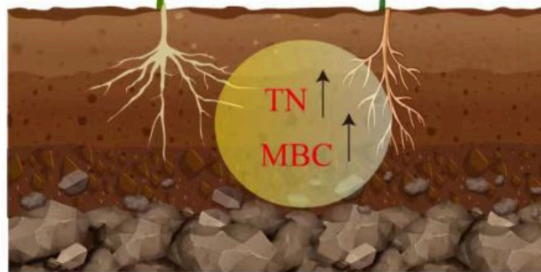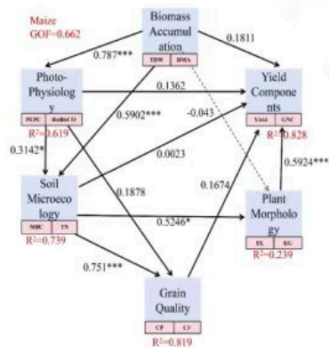

PLS-SEM

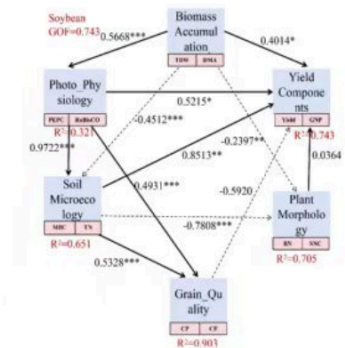

PLS-SEM
